# Supplementary material
Source: Research Square preprint supplement (doi:10.21203/rs.3.rs-8087824/v1)
Supplement: Supplementary file 1 [file 4d84a313478b9aaa4e9bd245.docx]

**Colon vs Rectal Tables**

**Table 1: Baseline characteristics of stage 3-4 EO-CRC patients by location group.**

| **Characteristics** | **Overall(162) (n, 100%)** | **Colon cancer (82) (n, 50.6%)** | **Rectal cancer (80) (n, 49.4%)** | **p-value** |
| --- | --- | --- | --- | --- |
| **Age** |  |  |  | 0.456 |
| Mean ± SD | 40.93±7.183 | 41.16±6.875 | 40.70±7.521 |  |
| Under 30 | 16(9.9%) | 7(8.5%) | 9(11.3%) |
| 30-40 | 49(30.2%) | 22(26.8%) | 27(33.8%) |
| 41-50 | 97(59.9%) | 53(64.6%) | 44(55%) |
| **Sex** |  |  |  |  |
| Male | 78(48.1%) | 44(53.7%) | 34(42.5%) | 0.155 |
| Female | 84(51.9%) | 38(46.3%) | 46(57.5%) |
| **Smoking history** | 53(32.7%) | 30(36.6%) | 23(28.8%) | 0.288 |
| **Alcohol history** | 47(29%) | 31(37.8%) | 16(20%) | 0.013 |
| **Chief symptoms at diagnosis** |  |  |  |  |
| Changes in bowel habits | 82(50.6%) | 36(43.9%) | 46(57.5%) | 0.084 |
| Hematochezia | 69(42.6%) | 21(25.6%) | 48(60%) | 0.000 |
| Abdominal Pain | 61(37.7%) | 49(59.8%) | 12(15%) | 0.000 |
| Distension and bloating | 5(3.1%) | 4(4.9%) | 1(1.3%) | 0.182 |
| Found incidentally on physical examination | 9(5.6%) | 6(7.3%) | 3(3.8%) | 0.322 |
| Other symptoms: Abdominal mass, anal or perianal symptoms, vomiting, dizziness, etc. | 16(9.9%) | 10(12.2%) | 6(7.5%) | 0.317 |
| **Other collateral symptoms** |  |  |  |  |
| Anemia | 6(3.7%) | 6(7.3%) | 0(0%) | 0.014 |
| Weightloss | 21(13%) | 15(18.3%) | 6(10.4%) | 0.041 |
| Haemorrhoids | 13(8%) | 4(4.9%) | 9(11.3%) | 0.132 |
| **Time to diagnosis (days)** |  |  |  | 0.036 |
| 1 month <30 | 69(42.6%) | 43(52.4%) | 26(32.5%) |  |
| 3 months 30-<90 | 34(21%) | 15(18.3%) | 19(23.8%) |
| 6 months 90-<180 | 39(24.1%) | 15(18.3%) | 24(30%) |
| 9 months 180-<270 | 7(4.3%) | 5(6.1%) | 2(2.5%) |
| 12 months 270-360 | 3(1.9%) | 2(2.4%) | 1(1.3%) |
| More than a year >360 | 10(6.2%) | 2(2.4%) | 8(10%) |
| Mean± SD | 137.344±239.99 | 90.500±128.76 | 184.188± 351.22 |  |
| **BMI** |  |  |  | 0.380 |
| <18.5 | 15(9.3%) | 9(11%) | 6(7.5%) |  |
| 18.5-25 | 107(66%) | 50(61%) | 57(71.3%) |
| 25-<30 | 40(24.7%) | 23(28%) | 17(21.3%) |
| **Family history** |  |  |  | 0.032 |
| Yes  No | 8(4.9%)  154(95.1%) | 7(8.5%)  75(91.5%) | 1(1.3%)  79(98.8%) |  |

**Table 2: Treatment and Surgical Details Table**

| **Characteristics** | **Overall(n, %)** | **Colon group(n, %)** | **Rectal group (n, %)** | **p-value** |
| --- | --- | --- | --- | --- |
| **Surgical approach**  Open  Laparoscopic  Robotic | 18(11.1%)  137(84.6%)  7(4.3%) | 12(14.6%)  66(80.5%)  4(4.9%) | 6(7.5%)  71(88.8%)  3(3.8%) | 0.316 |
| **Stoma creation** | 36(22.2%) | 12(14.6%) | 24(30%) | 0.019 |
| **Synchronous metastasis treatment**  **Yes**  **No**  **No mets/NA** | 22(13.6%)  16(9.9%)  124(76.5%) | 13(15.9%)  7(8.5%)  62(75.6%) | 9(11.3%)  9(11.3%)  62(77.5%) | 0.621 |
| **Blood transfusion** | 15(9.3%) | 10(12.2%) | 5(6.3%) | 0.192 |
| **Complications**  None  Surgical site infection  Anastomotic Leak/Fistula  Intrabdominal peritonitis  Intestinal obstruction  **Others**; difficulty passing urine and stools, colostomy leak and necrosis, etc | 136(84%)  9(5.6%)  7(4.3%)  3(1.9%)  3(1.9%)  4(2.5%) | 71(86.6%)  3(3.7%)  2(2.4%)  3(3.7%)  2(2.4%)  1(1.2%) | 65(81.3%)  6(7.5%)  5(6.3%)  0(0%)  1(1.3%)  3(3.8%) | 0.231 |
| **Length of hospital stay(days)**  Mean± standard deviation  Less than or equals 30  More than 30 | 18.33±8.89  147(90.7%)  15(9.3%) | 17.56±8.12  76(92.7%)  6(7.3%) | 19.1±9.66  71(88.8%)  9(11.3%) | 0.388 |
| **Surgery to discharge(days)**  Under 10  11-20  21-30  31-40  Above 40 | 74(45.7%)  65(40.1%)  15(9.3%)  5(3.1%)  3(1.9%) | 42(51.2%)  32(39%)  6(7.3%)  1(1.2%)  1(1.2%) | 32(40%)  33(41.3%)  9(11.3%)  4(5%)  2(2.5%) | 0.396 |
| **Time from surgery to chemotherapy(days)**  Mean ± SD  Less than or equal 30  More than 30 | 27.03±17.6  113(69.8%)  49(30.2%) | 23.79±13.1  64(78%)  18(22%) | 30.26±22.1  49(61.3%)  31(38.8%) | 0.020 |
| **Neoadjuvant therapy**  **Yes**  **No** | 29(17.9%)  133(82.1%) | 7(8.5%)  75(91.5%) | 22(27.5%)  58(72.5%) | 0.002 |
| **Neoadjuvant chemotherapy regimen**  FOLFOX,  CAPOX  FOLFOXIRI  None | 14(8.6%)  6(3.7%)  9(5.6%)  133(82.1%) | 3(3.7%)  1(1.2%)  3(3.7%)  75(91.5%) | 11(13.8%)  5(6.3%)  6(7.5%)  58(72.5%) | 0.016 |
| **Neoadjuvant Radiotherapy**  Yes  No | 9(5.6%)  153(94.4%) | 0(0%)  82(100%) | 9(11.3%)  71(88.8%) | 0.002 |
| **Neoadjuvant Immunotherapy**  Yes  No | 5(3.1%)  157(96.9%) | 1(1.2%)  81(98.8%) | 4(5%)  76(95%) | 0.164 |
| **Adjuvant chemotherapy regimen**  FOLFOX,  CAPOX/XELOX,  FOLFIRI  FOLFOXIRI  Others  None/Unspecified | 90(55.6%)  38(23.5%)  5(3.1%)  2(1.2%)  5(3.1%)  22(13.6%) | 43(52.4%)  19(23.2%)  4(4.9%)  0(0%)  2(2.4%)  14(17.1%) | 47(58.8%)  19(23.8%)  1(1.3%)  2(2.5%)  3(3.8%)  8(10%) | 0.327 |
| **Postop Radiotherapy** | 22(13.6%) | 10(12.2%) | 12(15%) | 0.602 |
| **Postop Immunotherapy** | 36(22.2%) | 13(15.9%) | 23(28.8%) | 0.048 |

**Table 3: Pathological Outcomes**

| **Characteristics** | **Overall (n, %)** | **Colon group (n, %)** | **Rectal group (n, %)** | **p-value** |
| --- | --- | --- | --- | --- |
| **Tumor location subdivision**  Left Colon  Right colon  Transverse  Sigmoid  Low Rectum  Mid rectum  High rectum | 16(9.9%)  27(16.7%)  8(4.9%)  31(19.1%)  46(28.4%)  28(17.3%)  6(3.7%) | 16(19.5%)  27(32.9%)  8(9.8%)  31(37.8%)  -  -  - | -  -  -  -  46(57.5%)  28(35%)  6(7.5%) | 0.000 |
| **Clinical Staging**  3  4 | 114(70.4%)  48(29.6%) | 52(63.4%)  30(36.6%) | 62(77.5%)  18(22.5%) | 0.050 |
| **T stage**  0  1  2  3  4 | 2(1.2%)  2(1.2%)  13(8%)  81(50%)  64(39.5%) | 0(0%)  0(0%)  3(3.7%)  39(47.6%)  40(48.8%) | 2(2.5%)  2(2.5%)  10(12.5%)  42(52.5%)  24(30%) | 0.018 |
| **N stage**  0  1  2  3 | 58(35.8%)  56(34.6%)  47(29%)  1(0.6%) | 37(45.1%)  23(28%)  22(26.8%)  0(0%) | 21(26.3%)  33(41.3%)  25(31.3%)  1(1.3%) | 0.061 |
| **Pathological Staging**  0  1  2  3  4 | 2(1.2%)  3(1.9%)  38(23.5%)  71(43.8%)  48(29.6%) | 0(0%)  1(1.2%)  26(31.7%)  25(30.5%)  30(36.6%) | 2(2.5%)  2(2.5%)  12(15%)  46(57.5%)  18(22.5%) | 0.002 |
| **Histological type**  Mucinous,  Signet ring cell  Adenocarcinoma  Ulcerative  Unknown | 32(19.8%)  5(3.1%)  89(54.9%)  34(21%)  2(1.2%) | 19(23.2%)  1(1.2%)  40(48.8%)  22(26.8%)  0(0%) | 13(16.3%)  4(5%)  49(61.3%)  12(15%)  2(2.5%) | 0.068 |
| **Pathological differentiation**  Low differentiation  Low-Mid  Middle differentiation  Mid-High  Highly differentiation  Undifferentiated | 10(6.2%)  85(52.5%)  16(9.9%)  15(9.3%)  21(13%)  15(9.3%) | 5(6.1%)  43(52.4%)  10(12.2%)  9(11%)  10(12.2%)  5(6.1%) | 5(6.3%)  42(52.5%)  6(7.5%)  6(7.5%)  11(13.8%)  10(12.5%) | 0.654 |
| **Neurovascular Invasion**  None  Vascular  Neurologic  Neurologic+Vascular | 85(52.5%)  30(18.5%)  34(21%)  13(8%) | 45(54.9%)  13(15.9%)  19(23.2%)  5(6.1%) | 40(50%)  17(21.3%)  15(18.8%)  8(10%) | 0.580 |
| **Lymph Nodes involvement**  Yes | 102(63%) | 44(53.7%) | 58(72.5%) | 0.013 |
| **LN harvest**  Mean±SD  Median(range)  Less than or equals 12  More than 12 | 14.25±4.912  14(36)  54(33.3%)  108(66.7%) | 15.21±4.626  15(24)  21(25.6%)  61(74.4%) | 13.27±5.031  13(36)  33(41.3%)  47(58.8%) | 0.035 |
| **Positive Resection Margin(cm)**  Mean ± SD | 4.32±3.266 | 5.80±3.773 | 2.80±1.593 | 0. |
| **Metastasis at diagnosis**  Yes | 48(29.6%) | 30(36.6%) | 18(22.5%) | 0.050 |
| **Synchronous Metastasis site**  Liver  Lungs  Peritoneal, mesenteric, omental  Inguinal, mesenteric, pelvic lymph nodes  Others | 30(18.5%)  8(4.9%)  9(5.6%)  7(4.3%)  7(4.3%) | 20(24.4%)  5(6.1%)  8(9.8%)  1(1.2%)  7(8.5%) | 10(12.5%)  3(3.8%)  1(1.3%)  6(7.5%)  0(0%) | 0.051  0.491  0.018  0.049  0.008 |
| **Genetic test**  Yes | 22(13.6%)  140(86.4%) | 10(12.2%)  72(87.8%) | 12(15%)  68(85%) | 0.602 |
| **Pathological Downstaging** | 43(26.5%) | 27 (32.9%) | 16(20%) | 0.06 |

**Table 4a Primary and Secondary Outcomes**

| **Outcome** | **Overall(162)** | **Colon(80)** | **Rectal(80)** | **p-value** | **Risk estimation (95% Cl)** |
| --- | --- | --- | --- | --- | --- |
| Pathological Downstaging | 43 | 27 | 16 | 0.06 | OR = 0.51 (0.25-1.04) |
| DFS Events | 65 | 26 | 39 | 0.02 | OR = 2.05 (1.08-3.88) |
| OS Events (Deaths) | 69 | 36 | 33 | 0.73 | OR = 0.89 (0.48-1.67) |
| Recurrence | 25 | 14 | 11 | 0.03 | -- |
| Metastasis | 56 | 20 | 36 | 0.004 | OR = 0.37 (0.19-0.73) |

**Table 4b Primary and Secondary Outcomes After Propensity Score Matching**

| **Outcome** | **Overall(132)** | **Colon(66)** | **Rectal(66)** | **p-value** | **Risk estimation (95% Cl)** |
| --- | --- | --- | --- | --- | --- |
| Pathological Downstaging | 12 | 5 | 7 | 0.74 | 0.80 (0.21-0.31) |
| DFS Events | 16 | 4 | 12 | 0.18 | 2.43 (0.63-9.38) |
| OS Events (Deaths) | 18 | 9 | 9 | 0.17 | 0.42 (0.12-1.45) |
| Recurrence | 7 | 3 | 4 | 0.71 | -- |
| Metastasis | 13 | 2 | 11 | 0.04 | 0.19 (0.04-1.04) |

**Table 5a Cox Regression analysis of Disease-free survival**

| **Variables** | | | | **DFS HR (95% CI)** | | --- | | **DFS**  **P-value** |
| --- | --- | --- | --- | --- | --- |
| Tumor location | | | 1.15 (0.70-1.90) | 0.56 |
| Age | | | 1.03 (0.99-1.06 | 0.14 |
| Neoadjuvant chemo (yes/no) | | | 1.18 (0.64-2.18) | 0.58 |
| Preoperative stage | | | 2.84 (1.72-4.67) | <0.001 |
| Postoperative stage | | | 2.10 (1.49-2.95) | <0.001 |
| Syn Mets | | | 2.84 (1.72-4.69) | <0.001 |
| Sex | | | 1.55 (0.94-2.54) | 0.08 |
| Tumor Location | Left | | 0.34 (0.94-1.21) | 0.95 |
| Right | | 0.29 (0.86-0.96) | 0.04 |
| Transverse | | 0.45 (0.10-2.01) | 0.29 |
| Sigmoid | | 0.26 (0.08-0.86) | 0.02 |
| Low rectum | | 0.26 (0.86-0.78) | 0.02 |
| Mid rectum | | 0.43 (0.14-1.29) | 0.13 |
|  | Total | | - | 0.26 |
| T Stage | | | 1.21 (0.84-1.74) | 0.28 |
| N stage | | | 1.56 (1.16-2.09) | 0.003 |
| Neurovascular Invasion | | | 1.59 (1.24-2.03) | <0.001 |
| Liver Syn Mets | | | 2.49 (1.35-4.58) | 0.003 |
| Lungs Syn Mets | | | 5.22 (2.12-12.86 | <0.001 |
| Postoperative Stage | | | 1.40 (0.71-2.75) | 0.33 |
| Histological Type | | Mucinous | 2.40 (0.005-10.76) | 0.46 |
| Signet ring | 0.66 (0.01-22.21) | 0.81 |
| Tubular Adenocarcinoma | 0.14 (0.003-6.02) | 0.30 |
| Ulcerative | 0.34 (0.008-15.16) | 0.57 |
| Metastasis | | | 12.79 (5.38-30.38) | <0.001 |
| Lymph node Involvement | | No | 1.30 (0.11-15.59) | 0.83 |
| Yes | 0.81 (0.08-8.45) | 0.86 |
| Metastasectomy | | Yes | 1.06 (0.27-4.19) | 0.92 |
| No | 1.23 (0.25-6.02) | 0.79 |
| No mets/NA | 1.77 (0.33-9.36) | 0.50 |
| Adjuvant chemo (yes/no) | | | 1.07 (0.86-1.32) | 0.53 |
| Adjuvant Chemotherapy | | FOLFOX | 0.67 (0.08-5.69) | 0.71 |
| CAPOX | 1.51 (0.25-9.22) | 0.65 |
| FOLFIRI | 1.48 (0.23-9.43 | 0.67 |
| FOLFOXIRI | 1.40 (0.08-22.63) | 0.81 |
| Other | 43.28 (0.88-2116) | 0.05 |

**Table 5b Cox Regression analysis of Overall survival**

| **Variables** | | | **OS HR (95% CI)** | **OS P-value** |
| --- | --- | --- | --- | --- |
| Tumor location | | | 1.39 (0.87-2.25) | 0.16 |
| Age | | | 1.00 (0.97-1.03) | 0.98 |
| Neoadjuvant chemo (yes/no) | | | 0.99 (0.53-1.81) | 0.98 |
| Preoperative stage | | | 1.65 (1.02-2.67) | 0.04 |
| Postoperative stage | | | 1.51 (1.11-2.06) | 0.008 |
| Syn Mets | | | 0.60 (0.37-0.98) | 0.04 |
| Sex | | | 0.99 (0.63-1.60) | 0.98 |
| Tumor Location | | Left | 0.68 (0.20-2.34) | 0.54 |
| Right | 0.74 (0.24-2.29) | 0.61 |
| Transverse | 0.18 (0.02-1.65) | 0.13 |
| Sigmoid | 0.68 (0.22-2.06) | 0.49 |
| Low rectum | 0.47 (0.16-1.39) | 0.17 |
| Mid rectum | 0.37 (0.12-1.20) | 0.10 |
|  | | Total | - | - |
| T Stage | | | 1.44 (1.00-2.08) | 0.05 |
| N stage | | | 1.11 (0.84-1.46) | 0.47 |
| Neurovascular Invasion | | | 1.26 (1.00-1.59) | 0.04 |
| Liver Syn Mets | | | 1.82 (1.04-3.18) | 0.35 |
| Lungs Syn Mets | | | 1.83 (0.76-4.42) | 0.17 |
| Histological Type | Mucinous | | -- | 0.89 | |
| Signet Sing | | -- | 0.89 | |
| Tubular Adenocarcinoma | | -- | 0.90 | |
| Ulcerative | | -- | 0.89 | |
| Metastasis | | | 0.82 (0.45-1.49) | 0.82 | |
| Lymph node Involvement | No | | 0.56 (0.12-2.52) | 0.45 | |
| Yes | | 0.47 (0.12-2.01) | 0.46 | |
| Metastasectomy | Yes | | 1.22 (0.36-4.04) | 0.74 | |
| No, positive | | 0.54 (0.12-2.41) | 0.41 | |
| No mets/NA | | 1.31 (0.32-5.28) | 0.70 | |
| Adjuvant chemo | | | 0.96 (0.75-1.21) | 0.71 | |
| Adjuvant Chemotherapy |  | | 1.85 (0.30-11.30) | 0.50 | |
| FOLFIRI | | 1.38 (0.26-7.16) | 0.69 | |
| FOLFOXIRI | | 1.65 (0.30-9.00) | 0.56 | |
| Other | | 1.05 (0.12-9.12) | 0.96 | |
